# Supplementary material for: Unravelling the pore network and gas dynamics in highly adaptive rubbery organic frameworks
Source: Royal Society of Chemistry journal article supplement (doi:10.1039/d2sc01355j), 2022-01-01
Supplement: d2sc01355j1.pdf [file d2sc01355j1.pdf]

# Supplementary materials - Unravelling pore network and gas dynamics in highly adaptive rubbery organic frameworks

Romain Dupuis,<sup>†,‡</sup> Mihail Barboiu,<sup>\*,†</sup> and Guillaume Maurin<sup>\*,‡</sup>

<sup>†</sup>*Institut Européen des Membranes, Adaptive Supramolecular Nanosystems Group,  
University of Montpellier, ENSCM-CNRS, UMR5635, Place E. Bataillon CC047, 34095  
Montpellier, France*

<sup>‡</sup>*Institut Charles Gerhardt Montpellier, University of Montpellier, CNRS, ENSCM,  
Montpellier, France.*

E-mail: mihail-dumitru.barboiu@umontpellier.fr; guillaume.maurin1@umontpellier.fr

## Atomic partial charges for the building blocks of ROFs

## Dialdehyde

| Atom | q      | x            | y            | z             |
|------|--------|--------------|--------------|---------------|
| c    | 0.0337 | 1.498132507  | 2.4456631778 | 22.3210150984 |
| c    | 0.0337 | 1.4981776805 | 2.1392957333 | 19.9143640286 |
| c    | -0.241 | 1.4969874318 | 1.6055187532 | 21.2052955477 |
| c    | -0.241 | 1.4993213989 | 3.8356224079 | 22.1367617468 |
| c    | -0.241 | 1.4997749562 | 3.530791663  | 19.7429037659 |
| c    | -0.241 | 1.4998880609 | 4.3721551075 | 20.8520704368 |
| c    | 0.501  | 1.4989639555 | 1.858431709  | 23.6781060609 |
| c    | 0.501  | 1.4985838528 | 1.2286510879 | 18.7491239606 |
| o    | -0.501 | 1.5039740269 | 2.5008758887 | 24.7161756404 |
| o    | -0.501 | 1.5049920388 | 1.587587062  | 17.5822245489 |
| h    | 0.234  | 1.4951673087 | 0.5205994505 | 21.3426126502 |
| h    | 0.244  | 1.5000399956 | 4.4762211336 | 23.0186693106 |
| h    | 0.08   | 1.5011854253 | 3.9286158041 | 18.7277965323 |
| h    | 0.18   | 1.495728022  | 5.3804361349 | 20.8278739026 |
| h    | -0.004 | 1.4944353362 | 0.7401294658 | 23.696725139  |
| h    | -0.004 | 1.4922431754 | 0.1415371243 | 19.0127125695 |

## polyTHF

| Atom | q      | x            | y            | z              |
|------|--------|--------------|--------------|----------------|
| c    | 0.125  | 1.5428341992 | 3.0854612692 | 10.3400250545  |
| c    | 0.032  | 1.324683673  | 2.1848378428 | 11.5418432758  |
| c    | 0.39   | 1.4957963945 | 2.9243118032 | 12.8638656641  |
| c    | 0.34   | 1.5483309601 | 3.0800483227 | 7.9645344876   |
| c    | -0.02  | 1.5462359441 | 2.1340956344 | 6.7771375721   |
| c    | -0.02  | 1.5325436562 | 2.8746865393 | 5.4425652863   |
| c    | 0.324  | 1.5822993857 | 1.9336509842 | 4.2527833381   |
| c    | 0.282  | 1.5728574532 | 1.9151514749 | 1.876926952    |
| c    | -0.005 | 1.5243140192 | 2.8395827792 | 0.6717550319   |
| c    | 0.004  | 1.5880844919 | 2.0844326403 | -0.6558166896  |
| c    | 0.275  | 1.5300072756 | 3.0124897969 | -1.8579394663  |
| c    | 0.327  | 1.496069035  | 3.0404569919 | -4.2270286148  |
| c    | 0.003  | 1.5289735519 | 2.1420310254 | -5.4515922281  |
| c    | -0.077 | 1.4519758024 | 2.9234985779 | -6.7643991118  |
| c    | 0.373  | 1.4998438553 | 2.0054757825 | -7.9727852566  |
| c    | 0.089  | 1.491825768  | 1.9706607755 | -10.3340082203 |
| c    | 0.0742 | 1.4244356322 | 2.8538760508 | -11.5670598675 |
| c    | 0.358  | 1.5132683011 | 2.047189523  | -12.8596748498 |
| o    | -0.494 | 1.3999327163 | 2.3152052954 | 9.1540473418   |
| o    | -0.518 | 1.5358113588 | 2.7057135273 | 3.0590032496   |
| o    | -0.519 | 1.5801400812 | 2.2385425084 | -3.0526319006  |
| o    | -0.493 | 1.4175539366 | 2.7787678318 | -9.1643737986  |
| n    | -1.038 | 1.4707621783 | 1.9820950983 | 13.9853395572  |
| n    | -1.055 | 1.3978057402 | 2.927131959  | -14.0256450869 |
| h    | 0.389  | 1.5959110633 | 2.4638908952 | 14.8752247577  |
| h    | 0.360  | 0.5748730436 | 1.4944804553 | 14.0314157726  |
| h    | -0.051 | 2.4724624628 | 3.4333599746 | 12.8786459019  |
| h    | -0.051 | 0.7283171817 | 3.7211754627 | 12.9336537511  |
| h    | 0.0236 | 2.0317909164 | 1.3438758714 | 11.5076102581  |
| h    | 0.0236 | 0.3121616602 | 1.7541646495 | 11.4861555555  |
| h    | 0.010  | 2.5560298432 | 3.5352228824 | 10.3800382685  |
| h    | 0.010  | 0.8150908242 | 3.9220871448 | 10.3369376014  |
| h    | -0.029 | 2.4934915034 | 3.6589276271 | 7.99501861     |
| h    | -0.029 | 0.7210434978 | 3.8141250736 | 7.8784916294   |
| h    | 0.008  | 0.6652169289 | 1.4800192694 | 6.8608835516   |
| h    | 0.008  | 2.4301990755 | 1.4816288347 | 6.8445176637   |
| h    | 0.006  | 2.3849235421 | 3.5681029686 | 5.3794058359   |
| h    | 0.006  | 0.6222565917 | 3.4873089908 | 5.3611092595   |
| h    | -0.028 | 0.7270833125 | 1.2286166379 | 4.2826103181   |
| h    | -0.028 | 2.5084757386 | 1.3239700373 | 4.2789742634   |
| h    | -0.020 | 0.7154835615 | 1.2122711994 | 1.8655302643   |
| h    | -0.020 | 2.4970804762 | 1.3025071691 | 1.857642656    |
| h    | 0.008  | 2.3611107446 | 3.5509393749 | 0.748158697    |
| h    | 0.008  | 0.6000183783 | 3.4349406873 | 0.7274631662   |
| h    | 0.006  | 0.7535048427 | 1.3703493103 | -0.724767622   |
| h    | -0.028 | 2.3385636827 | 3.7607103282 | -4.2509137806  |
| h    | -0.028 | 0.5598846117 | 3.634289664  | -4.2089977183  |
| h    | 0.001  | 0.6923007676 | 1.4293781391 | -5.3858365126  |
| h    | 0.001  | 2.4538811163 | 1.54529538   | -5.4233951563  |
| h    | 0.018  | 2.2851952991 | 3.6390562112 | -6.8325976599  |
| h    | 0.018  | 0.5247351349 | 3.5146649227 | -6.8064365752  |
| h    | -0.030 | 0.6619029065 | 1.2806896549 | -7.9370503739  |
| h    | -0.030 | 2.4385040319 | 1.4152411932 | -7.9706242553  |
| h    | 0.010  | 0.6583334753 | 1.2388354733 | -10.33765894   |
| h    | 0.010  | 2.4353489917 | 1.3873111989 | -10.3267913337 |
| h    | 0.020  | 2.2509883454 | 3.5818480432 | -11.5265627359 |
| h    | 0.020  | 0.489603325  | 3.4323976593 | -11.565709897  |
| h    | -0.038 | 0.6777933252 | 1.3299597457 | -12.8973736269 |
| h    | -0.038 | 2.4438578775 | 1.443912062  | -12.849065592  |
| h    | 0.393  | 1.4289885517 | 2.3952416581 | -14.895416348  |
| h    | 0.370  | 2.1712548156 | 3.5933299678 | -14.0540559002 |
| h    | -0.038 | 2.4438578775 | 1.443912062  | -12.849065592  |
| h    | 0.393  | 1.4289885517 | 2.3952416581 | -14.895416348  |
| h    | 0.369  | 2.1712548156 | 3.5933299678 | -14.0540559002 |

| PolyMePEG |         |          |          |         |
|-----------|---------|----------|----------|---------|
| Atom      | q       | x        | y        | z       |
| c         | -0.232  | 6.33504  | 9.23363  | 12.8126 |
| c         | -0.067  | 6.66275  | 8.98456  | 11.3044 |
| c         | -0.018  | 6.15891  | 7.58839  | 10.8358 |
| c         | 0.125   | 4.67324  | 7.67103  | 10.7147 |
| c         | 0.401   | 6.70601  | 7.29891  | 9.46311 |
| c         | 0.096   | 6.60863  | 6.5319   | 11.8585 |
| c         | -0.092  | 8.78376  | 5.50529  | 11.6575 |
| c         | 0.329   | 10.2959  | 5.80496  | 11.6991 |
| c         | -0.430  | 10.3189  | 7.32581  | 11.3066 |
| c         | -0.091  | 12.4938  | 4.58153  | 11.7063 |
| c         | 0.618   | 13.5176  | 3.75641  | 10.892  |
| c         | -0.678  | 14.6957  | 3.56735  | 11.9104 |
| c         | -0.044  | 4.23672  | 5.42553  | 9.66585 |
| c         | -0.122  | 6.95294  | 8.3981   | 7.21617 |
| c         | 0.496   | 3.00648  | 4.44985  | 9.43295 |
| c         | 0.479   | 8.40431  | 8.35628  | 6.68661 |
| c         | -0.408  | 7.98322  | 8.68552  | 5.21231 |
| c         | -0.278  | 1.78951  | 5.44569  | 9.38774 |
| c         | -0.0624 | 2.2715   | 2.92611  | 7.55273 |
| c         | 0.734   | 2.74181  | 2.0157   | 6.36471 |
| c         | -0.500  | 4.02044  | 2.75163  | 5.82416 |
| c         | -0.072  | 10.6364  | 7.29214  | 7.21015 |
| c         | 0.653   | 11.2948  | 5.87322  | 7.42741 |
| c         | -0.508  | 12.8129  | 5.97959  | 7.96415 |
| o         | -0.316  | 8.03452  | 6.76382  | 12.0591 |
| o         | -0.455  | 4.05772  | 6.30534  | 10.8411 |
| o         | -0.481  | 6.63732  | 8.54321  | 8.63528 |
| o         | -0.470  | 11.1199  | 4.80216  | 11.0106 |
| o         | -0.524  | 3.34887  | 3.62421  | 8.26861 |
| o         | -0.477  | 9.16318  | 7.10166  | 6.93891 |
| n         | -0.982  | 12.8777  | 2.50575  | 10.268  |
| n         | -0.974  | 10.48    | 4.9334   | 8.2383  |
| n         | -1.157  | 1.67605  | 1.65975  | 5.36566 |
| h         | 0.056   | 6.25723  | 9.8048   | 10.6775 |
| h         | 0.0516  | 7.7999   | 8.91446  | 11.2144 |
| h         | 0.045   | 6.07498  | 6.54312  | 12.8502 |
| h         | 0.045   | 6.44339  | 5.51135  | 11.4809 |
| h         | 0.095   | 8.54698  | 5.18719  | 10.6374 |
| h         | 0.095   | 8.41888  | 4.68677  | 12.3031 |
| h         | 0.036   | 10.6627  | 5.75954  | 12.7567 |
| h         | 0.118   | 11.3628  | 7.78912  | 11.2984 |
| h         | 0.118   | 9.76684  | 7.5462   | 10.3549 |
| h         | 0.118   | 9.80479  | 7.84354  | 12.1347 |
| h         | 0.079   | 12.2489  | 4.01557  | 12.6982 |
| h         | 0.079   | 12.8989  | 5.58496  | 12.0214 |
| h         | 0.017   | 13.8014  | 4.34636  | 9.97694 |
| h         | 0.167   | 15.6147  | 3.03446  | 11.4276 |
| h         | 0.167   | 15.1727  | 4.52308  | 12.311  |
| h         | 0.167   | 14.4456  | 2.86015  | 12.761  |
| h         | 0.387   | 11.9158  | 2.69596  | 9.71237 |
| h         | 0.320   | 12.76    | 1.66797  | 11.1126 |
| h         | 0.064   | 4.41554  | 8.21264  | 9.841   |
| h         | 0.064   | 4.33275  | 8.19346  | 11.7006 |
| h         | 0.104   | 5.16714  | 4.76641  | 9.7128  |
| h         | 0.104   | 4.27113  | 6.05275  | 8.73343 |
| h         | -0.047  | 2.83754  | 3.64987  | 10.2233 |
| h         | 0.066   | 0.821524 | 4.85407  | 9.24718 |
| h         | 0.066   | 1.8202   | 6.04754  | 10.3704 |
| h         | 0.066   | 1.85343  | 6.16965  | 8.54652 |
| h         | 0.121   | 4.83881  | 2.95614  | 6.52363 |
| h         | 0.121   | 4.39662  | 2.18457  | 4.93567 |
| h         | 0.121   | 3.66932  | 3.83332  | 5.55446 |
| h         | 0.116   | 13.4798  | 5.14719  | 7.58607 |
| h         | 0.116   | 13.3146  | 6.91506  | 7.62906 |
| h         | 0.116   | 12.7142  | 5.96235  | 9.15796 |
| h         | 0.096   | 7.12088  | 8.01899  | 4.94629 |
| h         | 0.096   | 7.6741   | 9.7556   | 5.05578 |
| h         | 0.096   | 8.78707  | 8.51579  | 4.49395 |
| h         | 0.064   | 1.45155  | 3.60917  | 7.10226 |
| h         | 0.064   | 1.57601  | 2.32565  | 8.25809 |
| h         | -0.089  | 2.98329  | 0.986976 | 6.72099 |
| h         | 0.348   | 0.625952 | 1.57419  | 5.78489 |
| h         | 0.424   | 1.80625  | 0.813563 | 4.62914 |
| h         | -0.051  | 6.1872   | 6.4268   | 8.92691 |
| h         | -0.051  | 7.78087  | 6.96667  | 9.55107 |
| h         | 0.115   | 6.36534  | 9.23011  | 6.72874 |
| h         | 0.115   | 6.4895   | 7.45784  | 6.79368 |
| h         | 0.013   | 9.06278  | 9.2538   | 7.04776 |
| h         | 0.047   | 11.1385  | 7.84987  | 6.3784  |
| h         | 0.047   | 10.834   | 7.92306  | 8.05976 |
| h         | -0.040  | 11.2985  | 5.43273  | 6.40538 |
| h         | 0.301   | 9.443    | 5.17186  | 7.81276 |
| h         | 0.374   | 10.4716  | 5.06357  | 9.37223 |
| h         | 0.061   | 5.25119  | 8.89656  | 13.0796 |
| h         | 0.061   | 7.07083  | 8.59568  | 13.3963 |
| h         | 0.061   | 6.49223  | 10.3007  | 13.1278 |

# Atomic partial charges for the ROFs when imine bond is formed

In order to take into account the charge transfer during the imine bond reaction, we computed the charges on the system when the bond is formed between polyTHF and the dialdehyde molecule. Three atoms have a charge that is strongly modified when the bond is formed: the O atom that initially belongs to the dialdehyde ( $q = -0.50$ ) and finally belongs to the water molecule ( $q = -0.71$ ); the C atom that initially belongs to the dialdehyde ( $q = 0.51$ ) and finally belongs to the CH=N imine bond ( $q = -0.66$ ); and the N atom that initially belongs to polyTHF ( $q = -1.0$ ) and finally belongs to the CH=N imine bond ( $q = .41$ ). The total charge for these three atoms is equal to  $-0.99$  before the reaction and equal to  $-0.96$  after the reaction. In order to maintain the charge constant in the system, when the bond is formed, the charge for O in the water molecule was taken as equal to  $-0.74$ . Considering that all the imine bonds in the system are equivalent, the charges are updated in the MC algorithm as follows:  $q_{\text{O}_{\text{bonded}}} = q_{\text{O}_{\text{non-bonded}}} - 0.24$ ;  $q_{\text{C}_{\text{bonded}}} = q_{\text{C}_{\text{non-bonded}}} - 1.17$ ; and  $q_{\text{N}_{\text{bonded}}} = q_{\text{N}_{\text{non-bonded}}} + 1.41$ .

## Free energy surface for the imine bond formation/dissociation

In the dynameric systems, each dialdehyde can connect to one or two polymers (either polyTHF or polyMePEG). The free energy surface was calculated using Metadynamics at the DFT level for the different cases (see Fig. S. 1). No significant differences are observed in the value of the energy barrier for all the different cases, which is in agreement with the fact that the reaction and the local chemical environment is similar for forming/dissociating the imine bond in each of the cases. In all cases, the reaction happens with a shortening of the C-N distance and a water molecule (or an OH group) is released after the imine bond is formed.

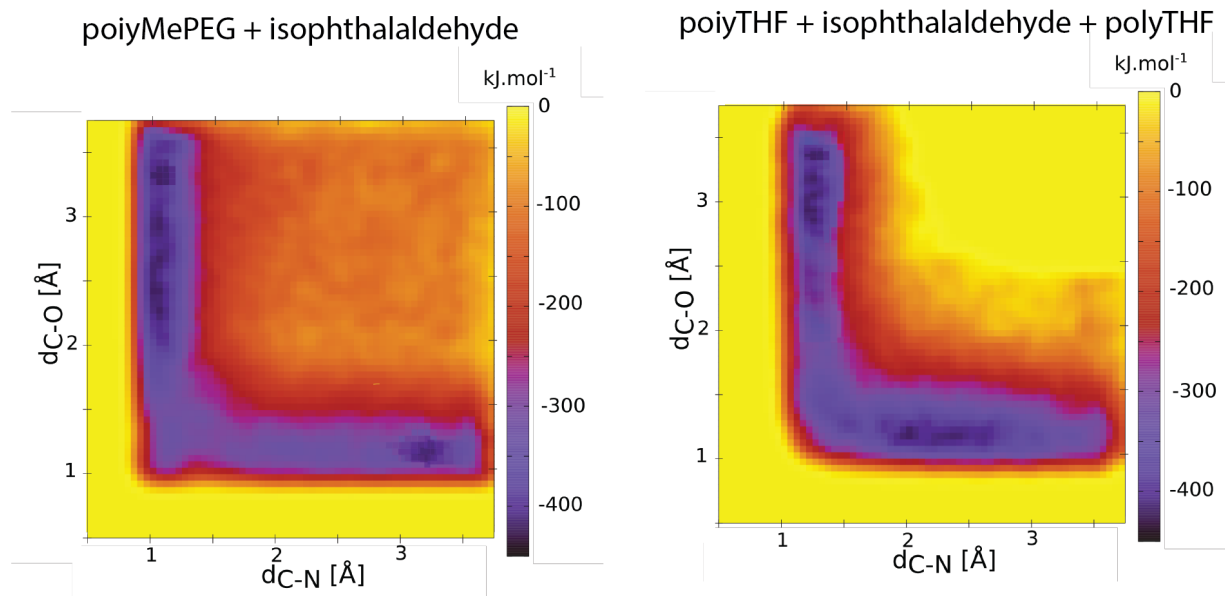

Fig. S. 1: Energy surface calculated for the imine bond in three different molecule association (polyMePEG + isophthalaldehyde / polyTHF + isophthalaldehyde + polyTHF).

## Connectivity of the ROF

Fig. S. 2 shows that a system with no solvent reaches a connectivity slightly lower than the same system containing chloroform. Moreover, the increase in connectivity is slower for the system with no solvent, which reflects the effect of solvent on the diffusion of species in the system.

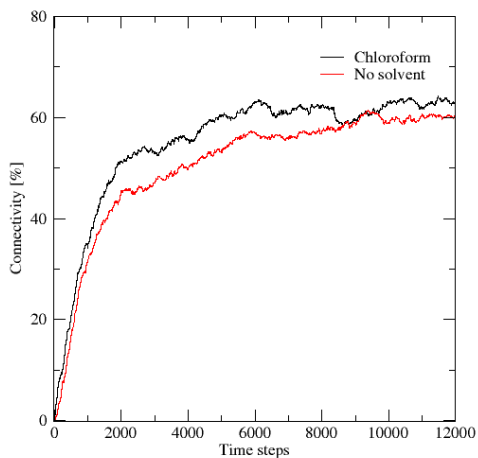

Fig. S. 2: MD-time dependence of the averaged global bond connectivity (%) for the ROF S25 dyanmer considering the energy barrier calculated by quantum calculations in the presence and absence of solvent

## Bulk modulus

The bulk modulus were estimated for S25 and S75 have been estimated by calculating the variation of the volume against applied pressure for three different pressures 0 GPa, 0.1 Gpa, and 1 Gpa. The calculated bulk modulus is 2.4 GPa for S25 and 4.9 GPa for S75.

## Radial distribution function

The radial distribution functions, showing the structure of polyTHF, obtained by quantum calculations and classical calculations are shown in Fig. S 3. The distribution functions are similar with both approaches.

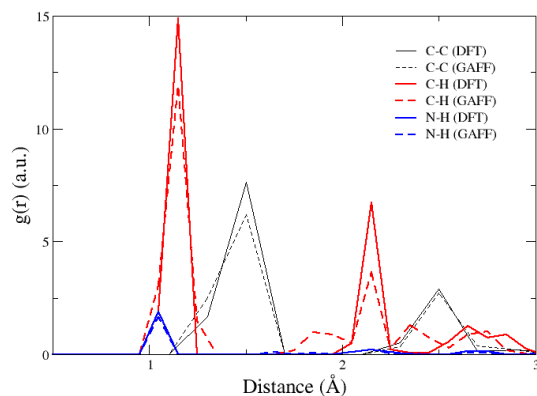

Fig. S. 3: Radial distribution functions computed with CPMD (DFT calculation) and LAMMPS using the GAFF force field performed on a single configuration after relaxation of the geometry of polyTHF.

## Pore size distribution after gas adsorption

The pore size distribution after gas adsorption is shown in Fig. S 4. In both systems, there is a peak at 3.3 Å, which corresponds to the kinetic diameter of CO<sub>2</sub>.

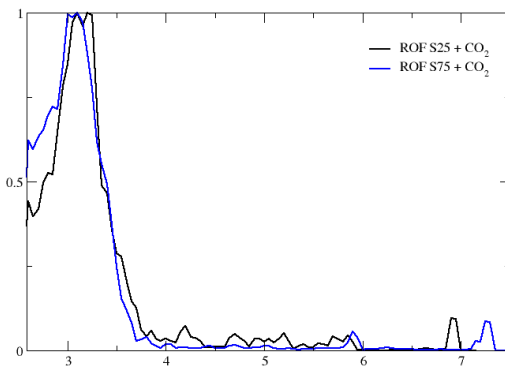

Fig. S. 4: Pore size distribution for ROF S25 and ROF S75 after CO<sub>2</sub> adsorption (CO<sub>2</sub> molecules are removed before calculating the PSD profile)
